# Supplementary figures and images for: Similarities and Differences in the Protein Composition of Cutaneous Melanoma Cells and Their Exosomes Identified by Mass Spectrometry
Source: MDPI journal article supplement (doi:10.3390/cancers15041097), 2023-02-08

Original blots from Figure 2

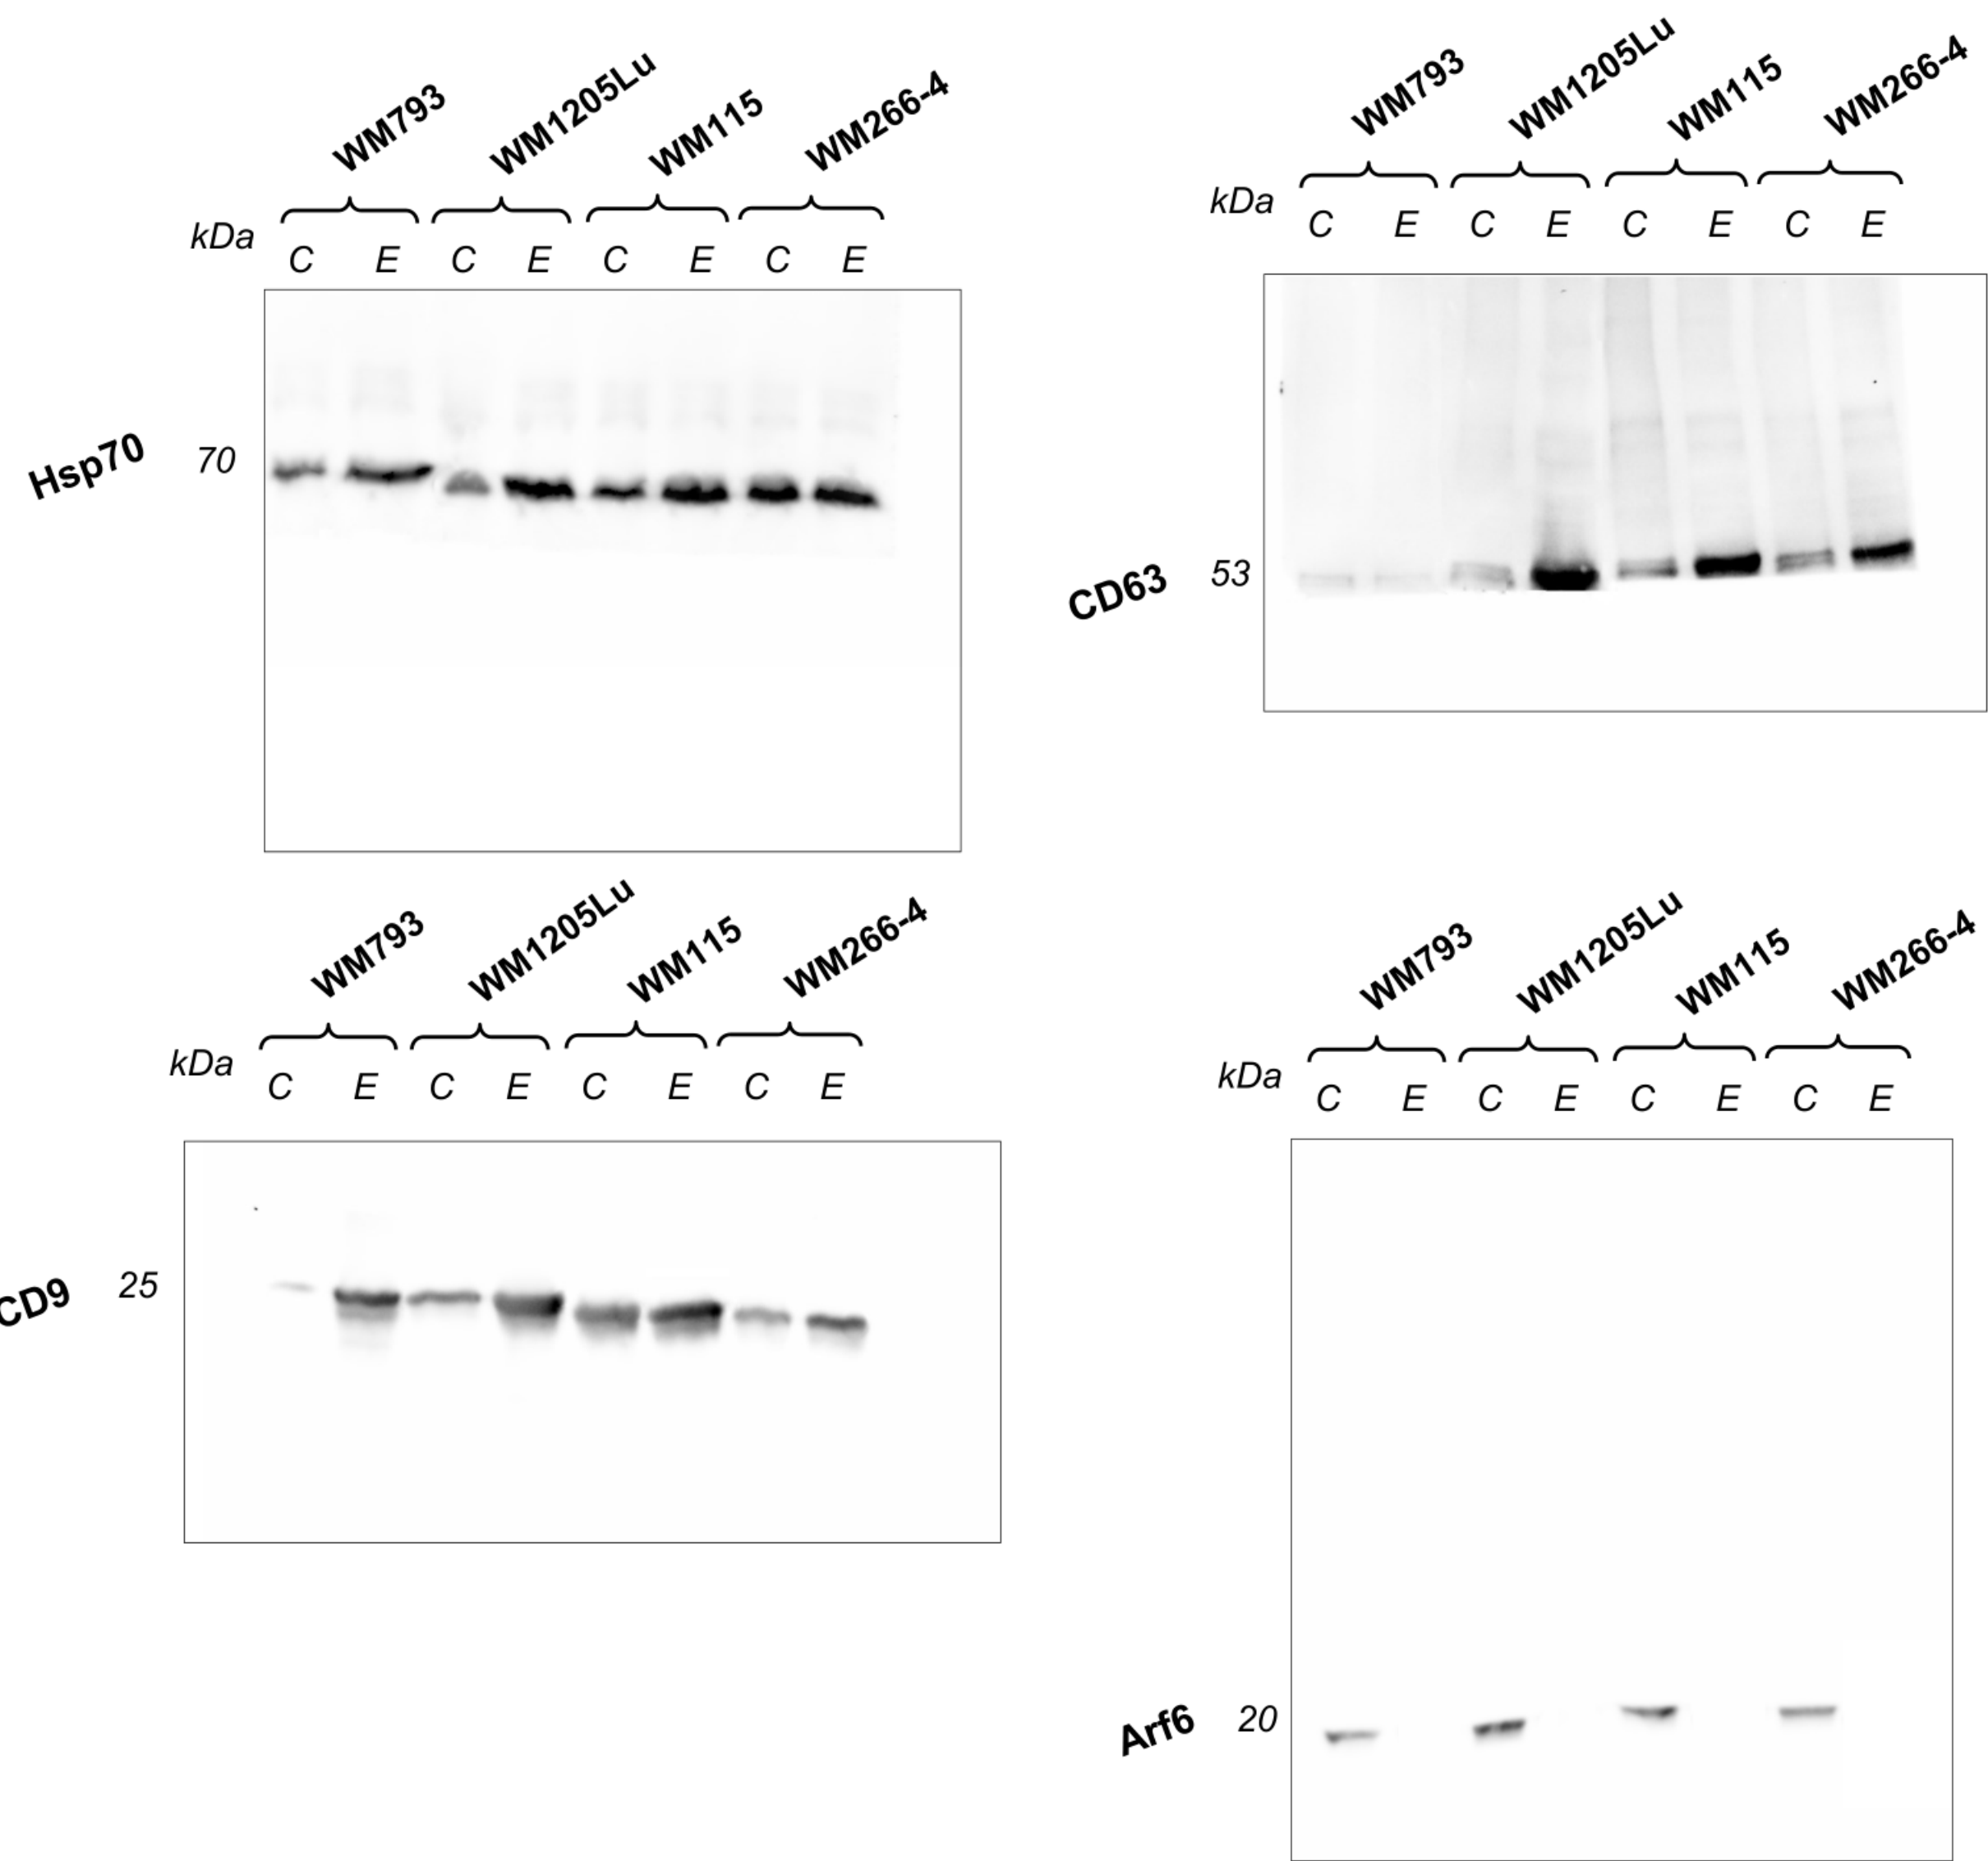

Supplement: s1 [file s1]
